# Supplementary material
Source: PubMed Central journal article supplement (PMC9236136)
Supplement: NIHMS1815935-supplement-1.pdf [file NIHMS1815935-supplement-1.pdf]

**Supplementary Table 1.** Average Characteristics<sup>a</sup> of Participants According to Sugar-Sweetened Beverage Consumption Categories in the Offspring Study and Third Generation

|                                           | SSB consumption categories (servings) |                                 |                       |                               |                                 |                       |
|-------------------------------------------|---------------------------------------|---------------------------------|-----------------------|-------------------------------|---------------------------------|-----------------------|
|                                           | Offspring                             |                                 |                       | Third Generation              |                                 |                       |
|                                           | Non-consumers<br>(0-<1/month)         | Occasional<br>(1/month-<1/week) | Frequent<br>(≥1/week) | Non-consumers<br>(0-<1/month) | Occasional<br>(1/month-<1/week) | Frequent<br>(≥1/week) |
| N (%)                                     | 197 (28.5)                            | 202 (29.2)                      | 292 (42.3)            | 225 (23.8)                    | 269 (28.5)                      | 451 (47.7)            |
| Median intake<br>(serv/week)              | 0                                     | 0.5                             | 3.2                   | 0                             | 0.5                             | 3.5                   |
| Age (y)                                   | 64.12 (± 8.14)                        | 63.5 (± 8.4)                    | 61.4 (± 9.0)          | 51.0 (± 5.8)                  | 47.6 (± 5.5)                    | 46.4 (± 5.6)          |
| Women (%)                                 | 139 (70.6)                            | 131 (64.9)                      | 129 (44.2)            | 156 (69.3)                    | 156 (58.0)                      | 128 (28.4)            |
| Current smoker (%)                        | 6 (3.05)                              | 6 (3.0)                         | 18 (6.2)              | 10 (4.4)                      | 4 (4.5)                         | 30 (6.7)              |
| Physical activity<br>score (METs/<br>day) | 35.4 (5.7)                            | 35.9 (5.9)                      | 35.7 (5.6)            | 34.3 (5.4)                    | 35.0 (6.4)                      | 34.3 (7.9)            |
| BMI (kg/m <sup>2</sup> )                  | 28.4 (± 5.3)                          | 27.6 (± 4.7)                    | 28.3 (± 4.9)          | 27.2 (± 5.6)                  | 27.2 (± 4.9)                    | 27.4 (± 4.7)          |
| Daily energy intake<br>(kcal/day)         | 1594.1 (606.7)                        | 1688.3 (689.4)                  | 1981.4 (737.6)        | 1834.2 (573.5)                | 1814.4 (693.3)                  | 2114.4 (911.1)        |
| Saturated fatty<br>acids (% energy)       | 19.5 (7.7)                            | 20.1 (10.4)                     | 24.1 (11.5)           | 19.9 (10.5)                   | 21.1 (9.9)                      | 26.1 (12.9)           |
| Whole grain (g/day)                       | 24.3 (21.5)                           | 22.3 (21.2)                     | 22.3 (18.2)           | 32.6 (24.4)                   | 32.9 (26.1)                     | 29.3 (23.7)           |
| Fruits (serv/day)                         | 1.9 (1.3)                             | 1.7 (1.2)                       | 1.8 (1.5)             | 2.1 (1.6)                     | 1.7 (1.4)                       | 1.4 (1.2)             |
| Vegetables (serv/<br>day)                 | 2.7 (1.7)                             | 2.4 (2.0)                       | 2.4 (1.7)             | 2.9 (2.0)                     | 2.3 (1.7)                       | 2.5 (1.7)             |
| Nuts (serv/day)                           | 0.3 (0.5)                             | 0.3 (0.5)                       | 0.3 (0.5)             | 0.4 (0.8)                     | 0.4 (0.6)                       | 0.4 (0.4)             |
| Fish (serv/day)                           | 0.3 (0.3)                             | 0.2 (0.3)                       | 0.3 (0.3)             | 0.3 (0.2)                     | 0.3 (0.3)                       | 0.3 (0.2)             |
| Diet soda (serv/day)                      | 0.6 (1.2)                             | 0.4 (0.8)                       | 0.4 (0.8)             | 0.5 (0.8)                     | 0.3 (0.8)                       | 0.4 (0.6)             |
| Coffee intake (serv/<br>week)             | 12.3 (10.5)                           | 10.3 (12.5)                     | 12.3 (12.0)           | 12.3 (10.5)                   | 17.5 (10.5)                     | 12.3 (10.5)           |
| Alcohol (drinks/<br>week)                 | 3.2 (5.5)                             | 3.5 (6.0)                       | 2.7 (6.2)             | 3.8 (5.5)                     | 4.2 (5.1)                       | 4.2 (6.1)             |
| AHEI (no SSB)                             | 54.8 (± 10.5)                         | 52.9 (± 9.2)                    | 50.3 (± 9.0)          | 61.0 (± 10.6)                 | 57.4 (± 9.5)                    | 51.4 (± 9.3)          |

AHEI, Alternate Healthy Eating Index; BMI, body mass index; METs, metabolic equivalents; serv, servings; SSB, sugar-sweetened beverage.

<sup>a</sup>Expressed as means (± standard deviation), median (interquartile range), or otherwise stated.

**Supplementary Table 2.** Adjusted Means of LPR Change Associated With Categories of SSB and Diet Soda Intakes in the Offspring and Third Generation Cohorts

| Cohort and categories of beverage intake (servings) | Median intake (servings/week) | N   | Multivariate <sup>a</sup> adjusted means of LPR change ( $\pm$ SE) | Multivariate <sup>a</sup> and BMI adjusted means of LPR change ( $\pm$ SE) |
|-----------------------------------------------------|-------------------------------|-----|--------------------------------------------------------------------|----------------------------------------------------------------------------|
| <b>SSB intake</b>                                   |                               |     |                                                                    |                                                                            |
| Offspring                                           |                               |     |                                                                    |                                                                            |
| Non-consumers (0-<1/month)                          | 0                             | 197 | -0.005 ( $\pm$ 0.004)                                              | -0.004 ( $\pm$ 0.003)                                                      |
| Occasional (1/month-<1/week)                        | 0.5                           | 202 | -0.013 ( $\pm$ 0.003)                                              | -0.013 ( $\pm$ 0.003)                                                      |
| Frequent ( $\geq$ 1/week)                           | 3.2                           | 292 | -0.016 ( $\pm$ 0.003)                                              | -0.016 ( $\pm$ 0.003)                                                      |
| P trend                                             |                               |     | .07                                                                | .04                                                                        |
| Third Generation                                    |                               |     |                                                                    |                                                                            |
| Non-consumers (0-<1/month)                          | 0                             | 225 | -0.014 ( $\pm$ 0.004)                                              | -0.011 ( $\pm$ 0.004)                                                      |
| Occasional (1/month-<1/week)                        | 0.5                           | 269 | -0.016 ( $\pm$ 0.004)                                              | -0.016 ( $\pm$ 0.003)                                                      |
| Frequent ( $\geq$ 1/week)                           | 3.5                           | 451 | -0.007 ( $\pm$ 0.003)                                              | -0.009 ( $\pm$ 0.003)                                                      |
| P trend                                             |                               |     | .08                                                                | .21                                                                        |
| <b>Diet soda intake</b>                             |                               |     |                                                                    |                                                                            |
| Offspring                                           |                               |     |                                                                    |                                                                            |
| Non-consumers (0-<1/month)                          | 0                             | 238 | -0.006 ( $\pm$ 0.003)                                              | -0.009 ( $\pm$ 0.003)                                                      |
| Occasional (1/month-<1/week)                        | 0.5                           | 132 | -0.016 ( $\pm$ 0.004)                                              | -0.017 ( $\pm$ 0.004)                                                      |
| Frequent ( $\geq$ 1/week)                           | 4.5                           | 321 | -0.015 ( $\pm$ 0.003)                                              | -0.012 ( $\pm$ 0.003)                                                      |
| P trend                                             |                               |     | .10                                                                | .91                                                                        |
| Third Generation                                    |                               |     |                                                                    |                                                                            |
| Non-consumers (0-<1/month)                          | 0                             | 371 | -0.008 ( $\pm$ 0.003)                                              | -0.011 ( $\pm$ 0.003)                                                      |
| Occasional (1/month-<1/week)                        | 0.5                           | 189 | -0.008 ( $\pm$ 0.004)                                              | -0.010 ( $\pm$ 0.004)                                                      |
| Frequent ( $\geq$ 1/week)                           | 3                             | 385 | -0.016 ( $\pm$ 0.003)                                              | -0.012 ( $\pm$ 0.003)                                                      |
| P trend                                             |                               |     | .04                                                                | .65                                                                        |

AHEI, Alternate Healthy Eating Index; BMI, body mass index; LPR, liver phantom ratio; SE, standard error; SSB, sugar-sweetened beverage.

<sup>a</sup>The models were adjusted for sex, averages of age, physical activity level, energy intake, coffee intake, AHEI (without SSB), intake of diet soda or SSB, change in current cigarette smoking status, and baseline LPR.
